# Supplementary material for: Neutralizing Antibody Response to Sarbecovirus Is Delayed in Sequential Heterologous Immunization
Source: MDPI journal article supplement (doi:10.3390/v14071382), 2022-06-24
Supplement: s1 [file s1]

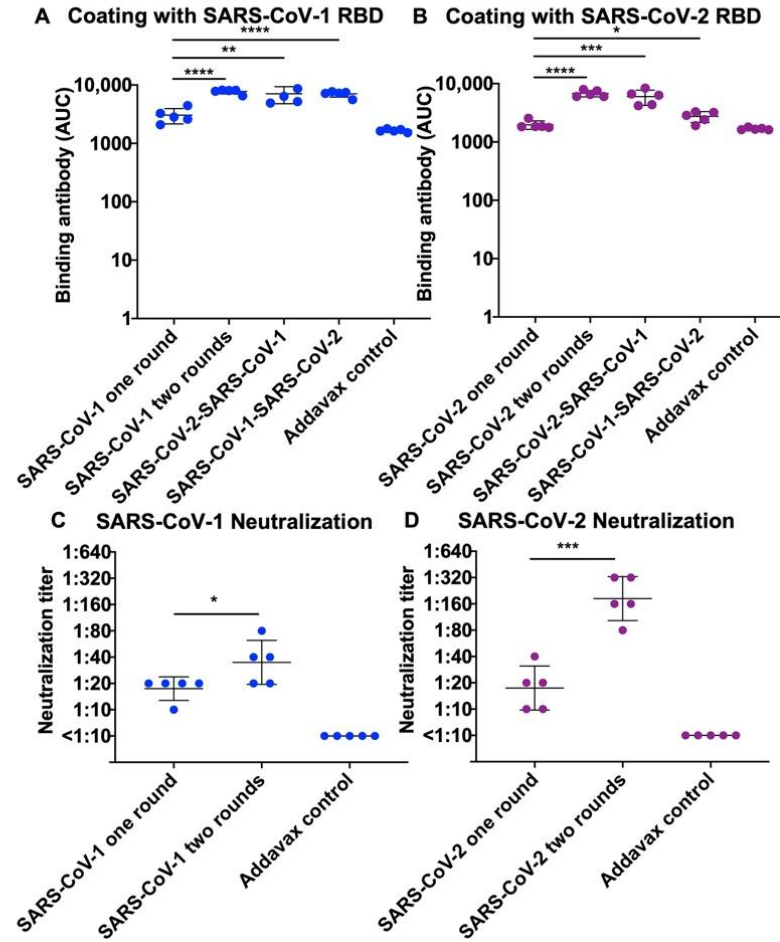

**Figure S1.** Binding and neutralizing antibodies after one or two rounds of homologous SARS-CoV-1 or SARS-CoV-2 immunization. **(A-B)** Binding antibody levels in plasma samples from mice immunized by one or two rounds of homologous or heterologous virus after day 14 against **(A)** SARS-CoV-1 RBD or **(B)** SARS-CoV-2 RBD were measured by ELISA assay. AUC, area under the curve. **(C-D)** Neutralizing titers of plasma samples from mice immunized by one or two rounds of homologous virus after day 14 against **(C)** SARS-CoV-1 or **(D)** SARS-CoV-2 were measured by a PRNT assay. Each data point in the figure represents the mean of two technical replicates. *p*-values were calculated using two-tailed t-test (\* *p* < 0.05, \*\* *p* < 0.01, \*\*\* *p* < 0.001, \*\*\*\* *p* < 0.0001). Error bars represent standard deviation.

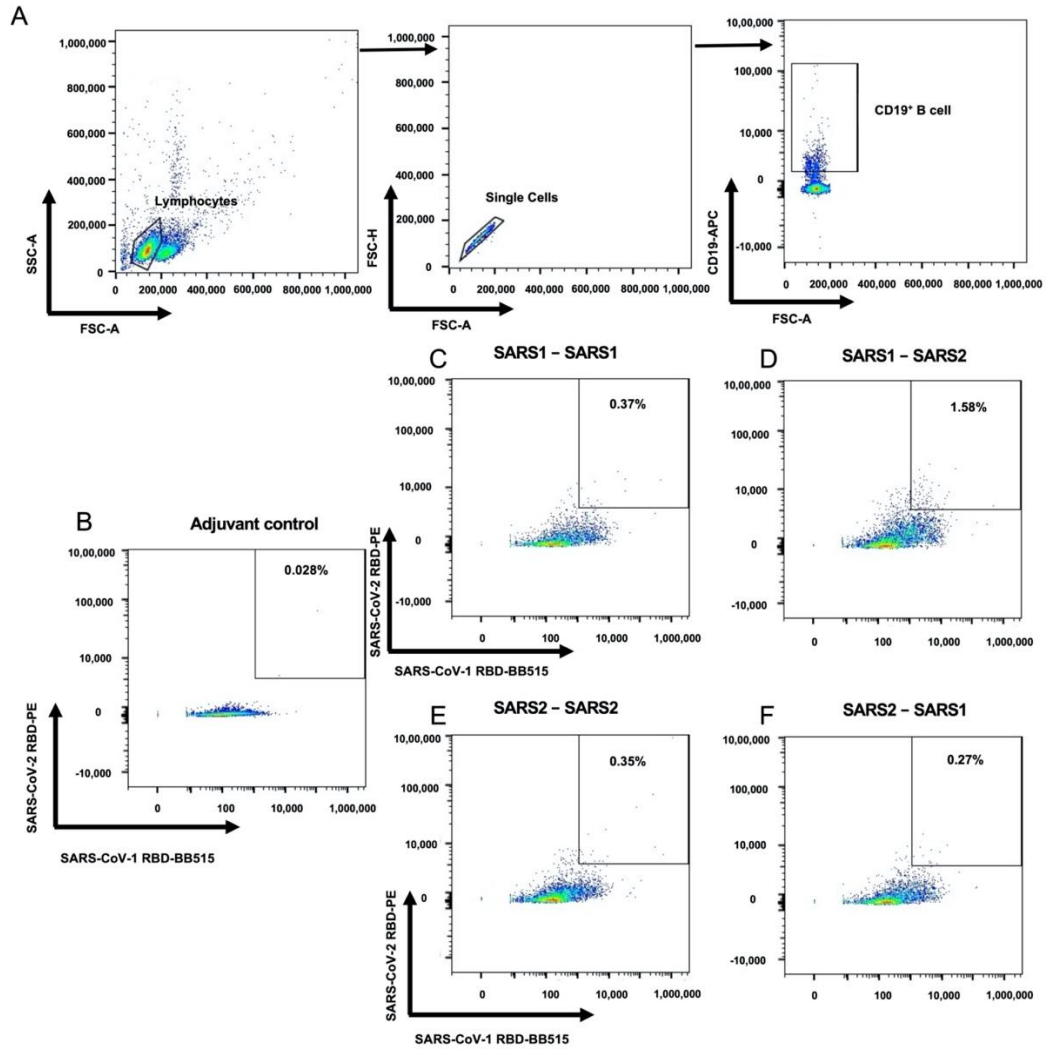

**Figure S2.** Gating strategy for SARS-CoV-1 and SARS-CoV-2 RBD-specific B cells. PBMCs isolated from the mice of the same immunization group (n=5) collected on day 14 after two rounds of immunization were pooled together and the cells were stained with anti-mouse CD19-APC, SARS-CoV-1-RBD-BB515 and SARS-CoV-2-RBD-PE. The data was acquired by flow cytometry and the B cells were identified by the gating strategy in (A). Percentages indicate the proportions of CD19<sup>+</sup>SARS-CoV-1 RBD<sup>+</sup> SARS-CoV-2 RBD<sup>+</sup> B cells among all B cells in different experimental conditions (B) Adjuvant only (C) SARS-CoV-1 homologous prime-boost (D) SARS-CoV-1-prime, SARS-CoV-2-boost, (E) SARS-CoV-2 homologous prime-boost (F) SARS-CoV-2-prime, SARS-CoV-2-boost.
